# Supplementary material
Source: PubMed Central journal article supplement (PMC6156889)
Supplement: ba013995-suppl1.pdf [file ba013995-suppl1.pdf]

## Supplemental Data

for

The endothelial glycocalyx anchors von Willebrand factor fibers to the vascular endothelium

Short title: Glycocalyx anchors von Willebrand factor fibers

Thejaswi Kalagara<sup>1,2,#</sup>, Tracy Moutsis<sup>1,#</sup>, Yi Yang<sup>3</sup>, Karin I. Pappelbaum<sup>1</sup>, Anne Farken<sup>1</sup>, Lucia Cladder-Micus<sup>2</sup>, Sabine Vidal-y-Sy<sup>4</sup>, Axel John<sup>5</sup>, Alexander T. Bauer<sup>4</sup>, Bruno M. Moerschbacher<sup>2</sup>, Stefan W. Schneider<sup>4</sup>, Christian Gorzelanny<sup>1,4,\*</sup>

<sup>1</sup> Department of Dermatology, Medical Faculty Mannheim, Heidelberg University, Theodor-Kutzer-Ufer 1-3, 68167 Mannheim, Germany

<sup>2</sup> Institute for Biology and Biotechnology of Plants, University of Münster, Schlossplatz 8, 48143 Münster, Germany

<sup>3</sup> Department of Orthopedics, Tongji Hospital, Tongji University School of Medicine, 389 Xincun Road, 200065 Shanghai, China

<sup>4</sup> University Hospital Hamburg-Eppendorf, Department of Dermatology and Venereology, Martinistraße 52, 20246 Hamburg.

<sup>5</sup> Department of Urology, University of Ulm, Prittwitzstraße 43, 89075 Ulm, Germany

# contributed equally

\* Corresponding author: Christian Gorzelanny  
Medical Faculty Mannheim, Heidelberg University  
Experimental Dermatology  
Theodor-Kutzer-Ufer 1-3  
68167 Mannheim, Germany  
tel.: +49 621 383 6904  
fax.: +49 621 383 6903  
Email: christian.gorzelanny@medma.uni-heidelberg.de

## **Methods**

### **Cell culture**

Human umbilical vein endothelial cells (HUVECs) from collagenase-digested human umbilical veins were isolated as described previously<sup>1</sup>. The cells were cultured at 37°C/5% CO<sub>2</sub> in M199 medium (Invitrogen, Darmstadt, Germany) supplemented with 10% heat inactivated fetal calf serum (FCS), 5 U/ml heparin (Biochrom, Berlin, Germany), 1% penicillin/streptomycin and 1% growth supplement derived from bovine retina<sup>1</sup>. HEK293 cells were maintained at 37°C/5% CO<sub>2</sub> in EMEM supplemented with 10% FCS. Where indicated, cells were pre-treated for 16 h with COS (2 µg/ml) or for 30 min with Heparinase-I (50 mU/ml, Sigma-Aldrich, St. Louis, MO, USA).

### **Immunofluorescence staining**

Cells and tissue slides were fixed with ice cold 4% paraformaldehyde in PBS for 20 min. Cells were washed and blocked with 2% bovine serum albumin (BSA) in incubation buffer (100 mM sodium phosphate buffer containing 4% sucrose) for 1 h at room temperature. Immunofluorescence staining was performed with primary anti-human VWF antibody (DAKO) and anti-SDC-1 antibody (R&D systems, Minneapolis, MN, USA) at a final dilution of 1:200 in incubation buffer containing 0.5% BSA overnight at 4°C. A secondary fluorescein isothiocyanate (FITC)-conjugated donkey anti-rabbit antibody (0.5 mg/ml, BD, Heidelberg, Germany) and/or Alexa555-conjugated donkey anti-goat antibody was used at a final dilution of 1:400 at room temperature for 1 h. Endothelial glycocalyx was stained with Texas Red conjugated wheat germ agglutinin (WGA; Invitrogen, Darmstadt, Germany), diluted 1000-fold in incubation buffer. Nuclei were stained with 1 µg/ml 4',6-diamidino-2-phenylindole (DAPI; Sigma Aldrich) in phosphate buffered saline (PBS) for 10 min. Cover slips were embedded into Mowiol-glycol solution containing 50 mg/ml 1,4-diazabicyclo[2.2.2]octane (DABCO; Sigma-Aldrich). Fluorescence images were acquired with an Observer.Z1 (Zeiss, Jena, Germany).

### **Preparation of chitosan and partially acetylated chitosan oligosaccharides (COS)**

Chitosan (Mahtani Chitosan Pvt. Ltd, India) with a degree of acetylation (DA) of 27% and a degree of polymerization (DP) of 818 was prepared and characterized as previously reported<sup>2-4</sup>. Partially acetylated chitosan oligosaccharides (COS) were prepared from chitosan by enzymatic hydrolysis using human recombinant chitotriosidase at 37°C in 150 mM

ammonium acetate buffer<sup>5</sup>. COS with a DP between 2 and 12 were separated by size exclusion chromatography on three HiLoad<sup>TM</sup> 26/60 Superdex<sup>TM</sup> 30 prep-grade columns. Collected fractions were analyzed by MALDI-TOF mass spectrometry using a UV laser and 2,5-dihydroxybenzoic acid (DHB) as the matrix.

### **Cell transfection**

HEK293 cells were transfected with vector pDsRed-N1 (Addgene plasmid #54493) containing the full-length human SDC-1 gene cloned from a HUVEC cDNA library. Stably transfected cells were obtained by selection with G418 (500 µg/ml).

The lentiviral vector pLentiADR3/IRP-SDC-1 was produced by subcloning the SDC-1 gene from pDsRed-SDC-1. Viruses were produced as previously reported.<sup>6</sup> Knockdown of Ext1 was conducted with shRNA (pGFP-C-shLenti, Origene, Rockville, USA). Two different shRNAs (shExt1-A: CAGACACCAGGAATGCCTTATATCACGTC; shExt1-B: GAGCGGAGAGTTTGAAGTCTTTACAGGCG) were tested. Vector shExt1-A showed the strongest silencing activity (shExt1-A: 59.6 ± 4.9%; shExt1-B: 50 ± 4.0% by qRT-PCR) and was therefore used for subsequent experiments. Transduced HUVECs were selected for 2 d with 0.5 µg/ml puromycin.

### **Enzyme linked immunosorbent assay (ELISA)**

VWF ELISA was performed as previously described<sup>7</sup>. The release of VWF from HUVECs was induced by stimulation with 50 µM histamine for 15 min. Cell supernatants were collected and added for 1 h at 37°C to a 96-well plate pre-coated with polyclonal rabbit anti-human VWF antibody (DAKO, Hamburg, Germany). Immobilized VWF was detected with a polyclonal rabbit anti-human VWF antibody conjugated to horseradish peroxidase (HRP). The HRP substrate (ABTS, Roche Diagnostics, Mannheim, Germany) was incubated for 0.5 h and the absorption was measured at 405 nm. Serially diluted human plasma was used to prepare a standard curve.

### **Quantitative real time PCR (qRT-PCR)**

Total RNA was extracted with the RNeasy mini kit (Qiagen, Hilden, Germany) and qRT-PCR was performed as previously reported using the Reverse Transcription System and the GoTaq® qPCR Master Mix (Promega, Heidelberg, Germany)<sup>8</sup>. The following primer pairs were used: Ext1: 5'-GAG ACA ATG ATG GGA CAG ACT TC-3' and 5'-CTC TGT CGC

TGG GCA AAG-3'; SDC-1: 5'-GCT CAC ACA CCT GTA GCA CT-3' and 5'-TGC TGT CTC CCG ACC ATA GA-3'; SDC-2: 5'-TCG GCG GAG TCG AGA GC-3' and 5'-CGT CGT GGT TTC CAC TTT TGG-3'; SDC-3: 5'-AAC TTC GAG AGA CCC GTG GA-3' and 5'-GCT CTT CCG GGA CTT CTG TC-3'; SDC-4: 5'-CCC CAA GAG AAT CTC ACC CG-3' and 5'-ATT GGT GGG GGC TTT CTT GT-3'. Expression levels were normalized to the endogenous  $\beta$ -actin gene (5'-AGA AAA TCT GGC ACC ACA CC-3' and 5'-CCA TCT CTT GCT CGA AGT CC-3').

### Preparation of platelets

Platelets were prepared as previously described<sup>9</sup>. Blood was drawn into sodium citrate-coated tubes (Sarstedt, Nuembrecht, Germany) and centrifuged at 120 x g for 15 min at room temperature to obtain platelet-rich plasma (PRP). PRP was supplemented with apyrase (75 microunits/ml; Sigma-Aldrich) and prostaglandin E1 (100 nM; Sigma-Aldrich) and centrifuged at 1200 x g for 15 min. The platelet pellet was resuspended in wash buffer (36 mM citric acid, 5 mM glucose, 5 mM KCl, 1 mM MgCl<sub>2</sub>, 103 mM NaCl, 2 mM CaCl<sub>2</sub>, 75 microunits/ml apyrase, 100 nM PGE<sub>2</sub>, 3.5 mg/ml BSA, pH 6.5) containing 5  $\mu$ M calcein red-orange (Invitrogen) and incubated for 30 min in the dark at room temperature. Subsequently, the platelets were centrifuged for 12 min at 1200 x g and washed twice with wash buffer. Finally, the pellet was resuspended in HEPES/Tyrode's buffer (137 mM NaCl, 2 mM KCl, 3 mM NaH<sub>2</sub>PO<sub>4</sub>, 1 mM MgCl<sub>2</sub>, 5.5 mM glucose, 5 mM HEPES, 12 mM NaHCO<sub>3</sub>, pH 7.4).

1. Desch A, Strozyk EA, Bauer AT, et al. Highly invasive melanoma cells activate the vascular endothelium via an MMP-2/integrin  $\alpha$ v $\beta$ 5-induced secretion of VEGF-A. *Am J Pathol.* 2012;181(2):693-705.
2. Vachoud L, Zydwicz N, Domard A. Formation and characterisation of a physical chitin gel. *Carbohydrate Research.* 1997;302(3-4):169-177.
3. Tian F, Liu Y, Hu K, Zhao BY. The depolymerization mechanism of chitosan by hydrogen peroxide. *Journal of Materials Science.* 2003;38(23):4709-4712.
4. Hirai A, Odani H, Nakajima A. Determination of Degree of Deacetylation of Chitosan by H-1-Nmr Spectroscopy. *Polymer Bulletin.* 1991;26(1):87-94.
5. Gorzelanny C, Pöppelmann B, Pappelbaum K, Moerschbacher BM, Schneider SW. Human macrophage activation triggered by chitotriosidase-mediated chitin and chitosan degradation. *Biomaterials.* 2010;31(33):8556-8563.
6. Evdokimov K, Biswas S, Schledzewski K, et al. Leda-1/Pianp is targeted to the basolateral plasma membrane by a distinct intracellular juxtamembrane region and modulates barrier properties and E-Cadherin processing. *Biochemical and Biophysical Research Communications.* 2016;475(4):342-349.
7. Gorzelanny C, Kmeth R, Obermeier A, et al. Silver nanoparticle-enriched diamond-like carbon implant modification as a mammalian cell compatible surface with antimicrobial properties. *Sci Rep.* 2016;6:22849.

8. Yang Y, Gorzelanny C, Bauer AT, et al. Nuclear heparanase-1 activity suppresses melanoma progression via its DNA-binding affinity. *Oncogene*. 2015;34(47):5832-5842.
9. De Ceunynck K, Rocha S, Feys HB, et al. Local elongation of endothelial cell-anchored von Willebrand factor strings precedes ADAMTS13 protein-mediated proteolysis. *J Biol Chem*. 2011;286(42):36361-36367.

## Figures

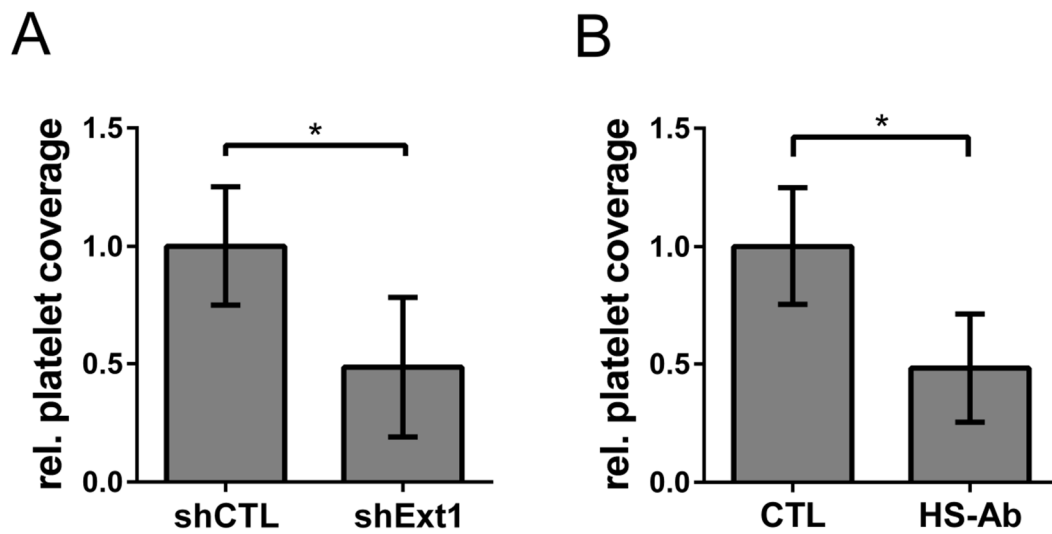

**Supplemental Figure 1: HS dependent anchorage of VWF-platelet strings at the endothelial surface.** **A** Knockdown of Ext-1 (shExt1) in HUVECs reduces VWF-mediated platelet binding in microfluidic experiments. HUVECs transduced with control shRNA vectors (shCTL) were used as control. **B** Reduced VWF-mediated platelet binding after blockage of HS by a specific antibody (HS-Ab; clone MAB2040, Merck-Millipore, Darmstadt, Germany). Mouse isotype IgG1 treated HUVECs were used as control (CTL). Release of VWF from the endothelial cells was induced with 50  $\mu$ M histamine. n=4, mean  $\pm$  SD, \* P  $\leq$  0.05 (Student's t-test)

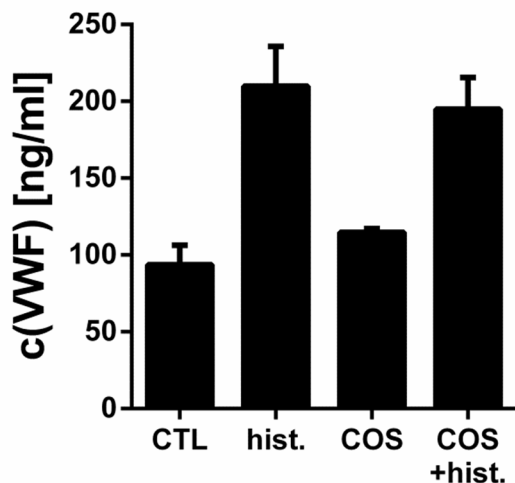

**Supplemental Figure 2: Measurement of VWF in the supernatant of HUVECs.** VWF release was induced by stimulation with 50  $\mu$ M histamine (hist.) and measured by ELISA. To test whether COS treatment affects the amount of releasable VWF, HUVECs were pre-treated with COS prior to the addition of histamine. n=3, mean  $\pm$  SD.

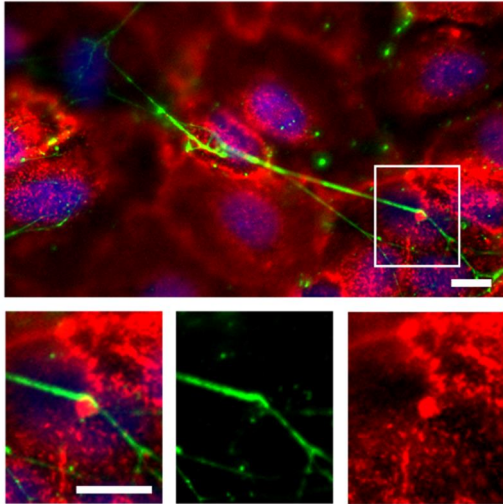

**Supplemental Figure 3: Anchorage of VWF fibers at the surface of HUVECs.** VWF was stained in green; the endothelial glycocalyx was stained with Texas-red conjugated wheat germ agglutinin in red. Nuclei were stained in blue. Scale bars correspond to 10  $\mu\text{m}$ .

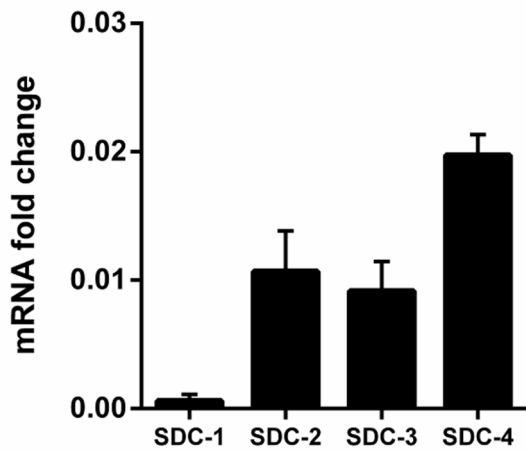

**Supplemental Figure 4: Expression of SDCs in HUVECs.** The expression levels of SDC-1, -2, -3 and -4 were measured by qRT-PCR. Data were normalized to the expression of  $\alpha$ -actin.

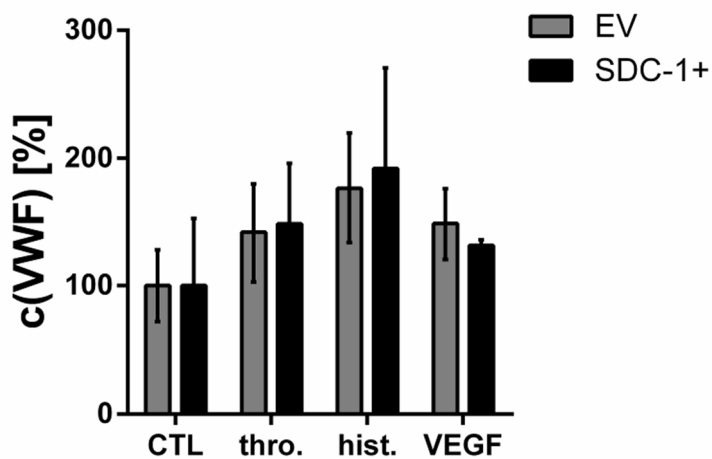

**Supplemental Figure 5: Release of VWF from viral transduced HUVECs.** VWF ELISA was used to control whether the over-expression of SDC-1 affects the releasable amount of VWF. HUVECs transduced with the empty vector (EV) or with SDC-1 vector (SDC-1<sup>+</sup>) were stimulated with thrombin (thro.), histamine (hist.) or VEGF-A.

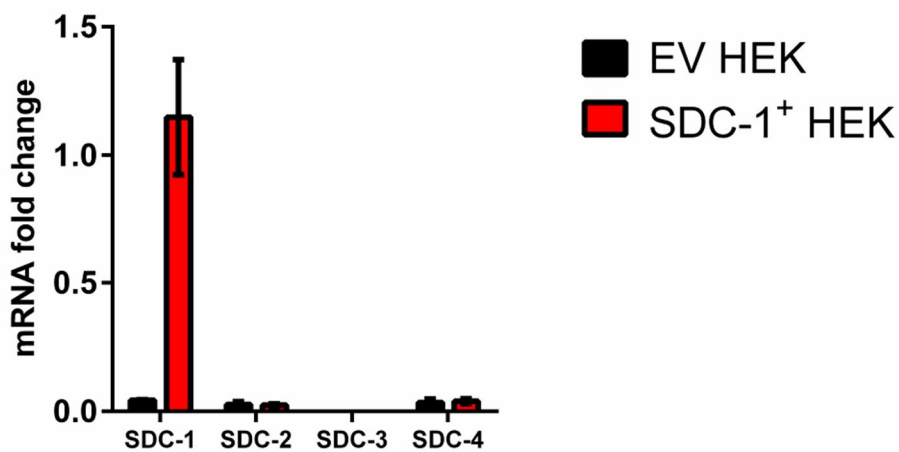

**Supplemental Figure 6: Expression of SDCs in HEK293 cells.** The expression levels of SDC-1, -2, -3 and -4 were measured by qRT-PCR in empty vector transfected cells (EV HEK) and cells overexpressing SCD-1 (SDC-1<sup>+</sup> HEK). Data were normalized to the expression of  $\beta$  actin.



## Videos

**Supplemental Movie 1: Binding of platelets to endothelial-released VWF.** HUVECs were perfused at a constant shear stress of 6 dyne/cm<sup>2</sup>. VWF release was induced by 50μM histamine. Platelets are shown in white, VWF fibers were stained in green using a FITC-conjugated antibody. The representative movie shows a sequence of 20 consecutive images recorded at a rate of 0.2 frames per second.

**Supplemental Movie 2: Platelets trapped by VWF fibers in close proximity to the endothelial glycocalyx.** HUVECs were perfused at a constant shear stress of 6 dyne/cm<sup>2</sup>. VWF release was induced by 50μM histamine. Platelets are stained with CellTrace blue (false color coded in green), VWF fibers were stained with an FITC-conjugated antibody (false color coded in white). The endothelial glycocalyx was labeled with Texas Red-conjugated WGA in red. The representative movie shows a sequence of 20 consecutive images recorded at a rate of 0.2 frames per second.
